# Supplementary material for: Connexin43 in Germ Cells Seems to Be Dispensable for Murine Spermatogenesis
Source: MDPI journal article supplement (doi:10.3390/ijms22157924), 2021-07-25
Supplement: s1 [file s1]

pGCCx43KO

| Bodyweight |       |
|------------|-------|
| KO         | WT    |
| 31.2       | 32.41 |
| 31.73      | 25.43 |
| 28.74      | 28.18 |
| 25.52      | 26.14 |
| 28.91      | 31.19 |
| 29.09      | 30.28 |
| 30.37      | 27.32 |
| 29.38      | 31.16 |
| 29.42      | 32.11 |
| 28.59      | 34.43 |
| 30.07      | 34.09 |

| Total Testis weight<br>(mg) |        |
|-----------------------------|--------|
| KO                          | WT     |
| 230.00                      | 250.00 |
| 230.00                      | 180.00 |
| 200.00                      | 260.00 |
| 200.00                      | 210.00 |
| 230.00                      | 310.00 |
| 280.00                      | 280.00 |
| 250.00                      | 270.00 |
| 260.00                      | 280.00 |
| 260.00                      | 260.00 |
| 270.00                      | 310.00 |
| 250.00                      | 300.00 |

| Relative Testis weight<br>(mg/g) |      |
|----------------------------------|------|
| KO                               | WT   |
| 7.37                             | 7.71 |
| 7.25                             | 7.08 |
| 6.96                             | 9.23 |
| 7.84                             | 8.03 |
| 7.96                             | 9.94 |
| 9.63                             | 9.25 |
| 8.23                             | 9.88 |
| 8.85                             | 8.99 |
| 8.84                             | 8.10 |
| 9.44                             | 9.00 |
| 8.31                             | 8.80 |

**Cell Counts:**

| WT  |    |       |  | KO  |    |       |
|-----|----|-------|--|-----|----|-------|
| GC  | SC | GC/SC |  | GC  | SC | GC/SC |
| 189 | 23 | 8.2   |  | 249 | 24 | 10.4  |
| 368 | 45 | 8.2   |  | 192 | 18 | 10.7  |
| 202 | 23 | 8.8   |  | 203 | 20 | 10.2  |
| 104 | 16 | 6.5   |  | 242 | 22 | 11.0  |
| 106 | 13 | 8.2   |  | 163 | 18 | 9.1   |
| 110 | 9  | 12.2  |  | 160 | 15 | 10.7  |
| 115 | 12 | 9.6   |  | 205 | 20 | 10.3  |
| 72  | 8  | 9.0   |  | 231 | 24 | 9.6   |
| 116 | 10 | 11.6  |  | 261 | 26 | 10.0  |
| 118 | 13 | 9.1   |  | 188 | 18 | 10.4  |
| 126 | 10 | 12.6  |  | 88  | 9  | 9.8   |
| 124 | 15 | 8.3   |  | 142 | 15 | 9.5   |
| 104 | 11 | 9.5   |  | 81  | 12 | 6.8   |
| 72  | 12 | 6.0   |  | 129 | 10 | 12.9  |
| 99  | 11 | 9.0   |  | 66  | 15 | 4.4   |
| 162 | 18 | 9.0   |  | 99  | 9  | 11.0  |
| 206 | 21 | 9.8   |  | 83  | 10 | 8.3   |
| 152 | 18 | 8.4   |  | 124 | 12 | 10.3  |
| 198 | 23 | 8.6   |  | 119 | 13 | 9.2   |
| 150 | 17 | 8.8   |  | 110 | 13 | 8.5   |
| 191 | 21 | 9.1   |  | 149 | 9  | 16.6  |
| 157 | 14 | 11.2  |  | 146 | 14 | 10.4  |
| 226 | 25 | 9.0   |  | 164 | 19 | 8.6   |
| 187 | 19 | 9.8   |  | 107 | 11 | 9.7   |
| 159 | 19 | 8.4   |  | 125 | 14 | 8.9   |
| 141 | 14 | 10.1  |  | 121 | 18 | 6.7   |
| 158 | 10 | 15.8  |  | 101 | 15 | 6.7   |
| 142 | 12 | 11.8  |  | 89  | 15 | 5.9   |
| 152 | 21 | 7.2   |  | 130 | 17 | 7.6   |
| 178 | 16 | 11.1  |  | 100 | 9  | 11.1  |
| 158 | 14 | 11.3  |  | 174 | 18 | 9.7   |
| 170 | 17 | 10.0  |  | 235 | 23 | 10.2  |
| 139 | 13 | 10.7  |  | 313 | 28 | 11.2  |
| 127 | 10 | 12.7  |  | 337 | 35 | 9.6   |
| 127 | 12 | 10.6  |  | 297 | 30 | 9.9   |
| 170 | 15 | 11.3  |  | 256 | 25 | 10.2  |
| 169 | 19 | 8.9   |  | 238 | 21 | 11.3  |
| 163 | 22 | 7.4   |  | 241 | 22 | 11.0  |
| 178 | 19 | 9.4   |  | 260 | 24 | 10.8  |
| 118 | 14 | 8.4   |  | 222 | 23 | 9.7   |

|     |    |      |  |     |    |      |
|-----|----|------|--|-----|----|------|
| 222 | 14 | 15.9 |  | 164 | 14 | 11.7 |
| 178 | 15 | 11.9 |  | 144 | 15 | 9.6  |
| 228 | 18 | 12.7 |  | 190 | 14 | 13.6 |
| 173 | 20 | 8.7  |  | 180 | 16 | 11.3 |
| 126 | 15 | 8.4  |  | 149 | 14 | 10.6 |

### **WB - Densitometry**

|         | WT         |            |            | KO         |            |            |
|---------|------------|------------|------------|------------|------------|------------|
| Tubulin | 78274529   | 51104676   | 87866450   | 54156689   | 60101734   | 74734244   |
|         |            |            |            |            |            |            |
| Cx43    | 3961621    | 3796015    | 5919905    | 2915769    | 4297291    | 9267590    |
|         |            |            |            |            |            |            |
|         | 19.7582073 | 13.4627171 | 14.8425439 | 18.5737241 | 13.9859586 | 8.06404297 |
