# Supplementary material for: Connexin43 in Germ Cells Seems to Be Dispensable for Murine Spermatogenesis
Source: MDPI journal article supplement (doi:10.3390/ijms22157924), 2021-07-25
Supplement: s1 [file s1]

**mGCCx43KO**

| Bodyweight |       |
|------------|-------|
| KO         | WT    |
| 26.03      | 27.05 |
| 32.44      | 32.97 |
| 27.77      | 34.58 |
| 31.08      | 27.86 |
| 33.28      | 33.61 |

| Total Testis weight<br>(mg) |        |
|-----------------------------|--------|
| KO                          | WT     |
| 210.00                      | 290.00 |
| 210.00                      | 230.00 |
| 270.00                      | 270.00 |
| 240.00                      | 230.00 |
| 260.00                      | 260.00 |

| Relative Testis weight<br>(mg/g) |            |
|----------------------------------|------------|
| KO                               | WT         |
| 8.06761429                       | 10.7208872 |
| 6.47348952                       | 6.97603882 |
| 9.72272236                       | 7.80798149 |
| 7.72200772                       | 8.25556353 |
| 7.8125                           | 7.73579292 |

**Cell Counts:**

| WT  |    |       | KO  |    |       |
|-----|----|-------|-----|----|-------|
| GC  | SC | GC/SC | GC  | SC | GC/SC |
| 173 | 20 | 8.7   | 135 | 17 | 7.9   |
| 143 | 17 | 8.4   | 166 | 18 | 9.2   |
| 181 | 20 | 9.1   | 189 | 23 | 8.2   |
| 198 | 22 | 9.0   | 188 | 19 | 9.9   |
| 168 | 19 | 8.8   | 179 | 23 | 7.8   |
| 173 | 20 | 8.7   | 147 | 19 | 7.7   |
| 143 | 17 | 8.4   | 185 | 21 | 8.8   |
| 181 | 20 | 9.1   | 306 | 29 | 10.6  |
| 198 | 22 | 9.0   | 192 | 16 | 12.0  |
| 168 | 19 | 8.8   | 101 | 13 | 7.8   |
| 136 | 17 | 8.0   | 146 | 15 | 9.7   |
| 92  | 13 | 7.1   | 166 | 19 | 8.7   |
| 98  | 10 | 9.8   | 121 | 11 | 11.0  |

|     |    |      |  |     |    |      |
|-----|----|------|--|-----|----|------|
| 156 | 17 | 9.2  |  | 153 | 12 | 12.8 |
| 128 | 11 | 11.6 |  | 88  | 12 | 7.3  |
| 173 | 19 | 9.1  |  | 224 | 26 | 8.6  |
| 192 | 18 | 10.7 |  | 217 | 23 | 9.4  |
| 203 | 23 | 8.8  |  | 158 | 19 | 8.3  |
| 204 | 19 | 10.7 |  | 172 | 20 | 8.6  |
| 365 | 45 | 8.1  |  | 237 | 24 | 9.9  |
| 182 | 22 | 8.3  |  | 211 | 25 | 8.4  |
| 141 | 12 | 11.8 |  | 122 | 11 | 11.1 |
| 129 | 15 | 8.6  |  | 165 | 19 | 8.7  |
| 133 | 10 | 13.3 |  | 123 | 13 | 9.5  |
| 134 | 12 | 11.2 |  | 99  | 14 | 7.1  |
| 123 | 14 | 8.8  |  | 136 | 17 | 8.0  |
| 77  | 9  | 8.6  |  | 98  | 10 | 9.8  |
| 106 | 13 | 8.2  |  | 142 | 16 | 8.9  |
| 130 | 17 | 7.6  |  | 160 | 16 | 10.0 |
| 95  | 14 | 6.8  |  | 156 | 17 | 9.2  |
| 197 | 21 | 9.4  |  | 143 | 13 | 11.0 |
| 176 | 18 | 9.8  |  | 156 | 12 | 13.0 |
| 198 | 18 | 11.0 |  | 112 | 13 | 8.6  |
| 164 | 16 | 10.3 |  | 187 | 17 | 11.0 |
| 183 | 17 | 10.8 |  | 105 | 16 | 6.6  |
| 162 | 15 | 10.8 |  | 121 | 13 | 9.3  |
| 160 | 15 | 10.7 |  | 113 | 10 | 11.3 |
| 167 | 18 | 9.3  |  | 83  | 11 | 7.5  |
| 112 | 8  | 14.0 |  | 224 | 20 | 11.2 |
| 145 | 13 | 11.2 |  | 201 | 22 | 9.1  |
| 83  | 8  | 10.4 |  | 173 | 21 | 8.2  |
| 133 | 12 | 11.1 |  | 210 | 21 | 10.0 |
| 128 | 13 | 9.8  |  | 190 | 18 | 10.6 |
| 102 | 10 | 10.2 |  | 206 | 20 | 10.3 |
| 119 | 9  | 13.2 |  | 196 | 19 | 10.3 |

### **WB - Densitometry**

|         | WT         |            |            | KO         |            |            |
|---------|------------|------------|------------|------------|------------|------------|
| Tubulin | 73929247   | 61382268   | 68376621   | 66636051   | 68270591   | 58167364   |
|         |            |            |            |            |            |            |
| Cx43    | 25679383   | 21667680   | 19292989   | 16540428   | 12384994   | 16326295   |
|         |            |            |            |            |            |            |
|         | 2.87893393 | 2.83289526 | 3.54411755 | 4.02867755 | 5.51236367 | 3.56280246 |
