# Supplementary material for: Connexin43 in Germ Cells Seems to Be Dispensable for Murine Spermatogenesis
Source: MDPI journal article supplement (doi:10.3390/ijms22157924), 2021-07-25
Supplement: s1 [file s1]

Supplemental Figure S1:

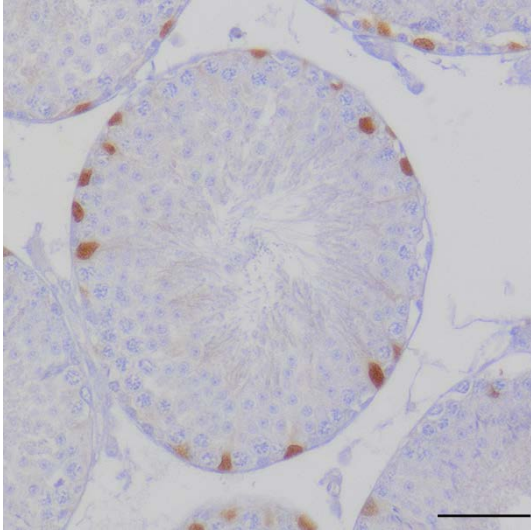

**Figure S1:** Example for a Sox9 immunohistochemistry. Sox9 is a marker for Sertoli cell nuclei, which allows accurate distinction between Sertoli cell nuclei (brown) and germ cell nuclei, which are counterstained with hematoxylin. Scale bar = 50  $\mu\text{m}$ .
