# Supplementary material for: Connexin43 in Germ Cells Seems to Be Dispensable for Murine Spermatogenesis
Source: Int J Mol Sci. 2021 Jul 25;22(15):7924. doi: 10.3390/ijms22157924 (PMC8348783; doi:10.3390/ijms22157924)
Supplement: Supplementary file 1 [file ijms-22-07924-s001.zip]

Archive with 5 entries (5 files):
- Figures S2-S5.pdf
- Supplemental Figure S1.pdf
- Supplemental_Table S1_pGCCx43KO.pdf
- Supplemental_Table S2_mGCCx43KO.pdf
- Supplemental_Table S3_qRTPCR.xlsx
