# Supplementary material for: Connexin43 in Germ Cells Seems to Be Dispensable for Murine Spermatogenesis
Source: Int J Mol Sci. 2021 Jul 25;22(15):7924. doi: 10.3390/ijms22157924 (PMC8348783; doi:10.3390/ijms22157924)
Supplement: Supplementary file 1 [file ijms-22-07924-s001.zip › Supplemental_Table S3_qRTPCR.xlsx]

## Sheet: Connexin_43
Reference Genes
Well	Well Name	Well Type	Threshold (dRn)	Ct (dRn)	Mean	SD	CV		RG Mean 664k
A1	Actb_1 664k	Unknown	0.0767	24.9	24.775	0.176777	0.00713529		22.1425
A2	Actb_1 664k	Unknown	0.0767	No Ct
A3	Actb_1 664k	Unknown	0.0767	24.65					RG Mean 672c
B1	Actb_1 672c	Unknown	0.0767	25.52	25.1867	0.356978	0.0141733		22.335
B2	Actb_1 672c	Unknown	0.0767	25.23
B3	Actb_1 672c	Unknown	0.0767	24.81					RG Mean 687i
C1	Actb_1 687i	Unknown	0.0767	24.7	24.4667	0.298719	0.0122092		21.78
C2	Actb_1 687i	Unknown	0.0767	24.57
C3	Actb_1 687i	Unknown	0.0767	24.13					RG Mean 705d
D1	Actb_1 705d	Unknown	0.0767	24.76	24.5233	0.263122	0.0107295		21.9167
D2	Actb_1 705d	Unknown	0.0767	24.57
D3	Actb_1 705d	Unknown	0.0767	24.24					RG Mean 677d
E1	Actb_1 677d	Unknown	0.0767	24.98	24.8933	0.080829	0.00324702		22.3867
E2	Actb_1 677d	Unknown	0.0767	24.82
E3	Actb_1 677d	Unknown	0.0767	24.88					RG Mean 688c
F1	Actb_1 688c	Unknown	0.0767	25.67	25.41	0.233024	0.00917055		23.195
F2	Actb_1 688c	Unknown	0.0767	25.34
F3	Actb_1 688c	Unknown	0.0767	25.22					RG Mean 710b
G1	Actb_1 710b	Unknown	0.0767	25	25.01	0.08544	0.00341624		22.2667
G2	Actb_1 710b	Unknown	0.0767	24.93
G3	Actb_1 710b	Unknown	0.0767	25.1					RG Mean 714b
H1	Actb_1 714b	Unknown	0.0767	24.97	24.6067	0.314696	0.012789		21.9483
H2	Actb_1 714b	Unknown	0.0767	24.42
H3	Actb_1 714b	Unknown	0.0767	24.43					RG Mean 664c
A4	Actb_1 664c	Unknown	0.0767	24.11	24.4933	0.362261	0.0147902		21.8117
A5	Actb_1 664c	Unknown	0.0767	24.54
A6	Actb_1 664c	Unknown	0.0767	24.83					RG Mean 672h
B4	Actb_1 672h	Unknown	0.0767	24.95	24.9967	0.136137	0.00544621		22.4633
B5	Actb_1 672h	Unknown	0.0767	24.89
B6	Actb_1 672h	Unknown	0.0767	25.15					RG Mean 687a
C4	Actb_1 687a	Unknown	0.0767	24.53	24.72	0.180831	0.00731519		22.25
C5	Actb_1 687a	Unknown	0.0767	24.74
C6	Actb_1 687a	Unknown	0.0767	24.89					RG Mean 705f
D4	Actb_1 705f	Unknown	0.0767	24.48	24.5833	0.0896289	0.00364592		21.88
D5	Actb_1 705f	Unknown	0.0767	24.63
D6	Actb_1 705f	Unknown	0.0767	24.64					RG Mean 677c
E4	Actb_1 677c	Unknown	0.0767	24.44	24.35	0.108167	0.00444216		21.9017
E5	Actb_1 677c	Unknown	0.0767	24.38
E6	Actb_1 677c	Unknown	0.0767	24.23					RG Mean 688b
F4	Actb_1 688b	Unknown	0.0767	24.48	24.41	0.0754983	0.00309293		21.91
F5	Actb_1 688b	Unknown	0.0767	24.33
F6	Actb_1 688b	Unknown	0.0767	24.42					RG Mean 710a
G4	Actb_1 710a	Unknown	0.0767	24.63	24.7967	0.187705	0.00756979		22.3817
G5	Actb_1 710a	Unknown	0.0767	25
G6	Actb_1 710a	Unknown	0.0767	24.76					RG Mean 714e
H4	Actb_1 714e	Unknown	0.0767	24.82	24.9433	0.120139	0.00481647		22.2067
H5	Actb_1 714e	Unknown	0.0767	24.95
H6	Actb_1 714e	Unknown	0.0767	25.06
A7	Hsp90ab1_1 664k	Unknown	0.0492	19.55	19.51	0.1249	0.00640184
A8	Hsp90ab1_1 664k	Unknown	0.0492	19.37
A9	Hsp90ab1_1 664k	Unknown	0.0492	19.61
B7	Hsp90ab1_1 672c	Unknown	0.0492	19.55	19.4833	0.106927	0.00548811
B8	Hsp90ab1_1 672c	Unknown	0.0492	19.36
B9	Hsp90ab1_1 672c	Unknown	0.0492	19.54
C7	Hsp90ab1_1 687i	Unknown	0.0492	19.2	19.0933	0.0929157	0.0048664
C8	Hsp90ab1_1 687i	Unknown	0.0492	19.03
C9	Hsp90ab1_1 687i	Unknown	0.0492	19.05
D7	Hsp90ab1_1 705d	Unknown	0.0492	19.29	19.31	0.111355	0.00576672
D8	Hsp90ab1_1 705d	Unknown	0.0492	19.21
D9	Hsp90ab1_1 705d	Unknown	0.0492	19.43
E7	Hsp90ab1_1 677d	Unknown	0.0492	19.89	19.88	0.205183	0.0103211
E8	Hsp90ab1_1 677d	Unknown	0.0492	19.67
E9	Hsp90ab1_1 677d	Unknown	0.0492	20.08
F7	Hsp90ab1_1 688c	Unknown	0.0492	No Ct	20.98	0	0
F8	Hsp90ab1_1 688c	Unknown	0.0492	20.98
F9	Hsp90ab1_1 688c	Unknown	0.0492	20.98
G7	Hsp90ab1_1 710b	Unknown	0.0492	19.6	19.5233	0.070946	0.00363391
G8	Hsp90ab1_1 710b	Unknown	0.0492	19.51
G9	Hsp90ab1_1 710b	Unknown	0.0492	19.46
H7	Hsp90ab1_1 714b	Unknown	0.0492	19.29	19.29	0.03	0.00155521
H8	Hsp90ab1_1 714b	Unknown	0.0492	19.32
H9	Hsp90ab1_1 714b	Unknown	0.0492	19.26
A10	Hsp90ab1_1 664c	Unknown	0.0492	19.03	19.13	0.156205	0.00816545
A11	Hsp90ab1_1 664c	Unknown	0.0492	19.05
A12	Hsp90ab1_1 664c	Unknown	0.0492	19.31
B10	Hsp90ab1_1 672h	Unknown	0.0492	19.96	19.93	0.137477	0.00689801
B11	Hsp90ab1_1 672h	Unknown	0.0492	19.78
B12	Hsp90ab1_1 672h	Unknown	0.0492	20.05
C10	Hsp90ab1_1 687a	Unknown	0.0492	19.82	19.78	0.0360555	0.00182283
C11	Hsp90ab1_1 687a	Unknown	0.0492	19.77
C12	Hsp90ab1_1 687a	Unknown	0.0492	19.75
D10	Hsp90ab1_1 705f	Unknown	0.0492	19.27	19.1767	0.0950438	0.00495622
D11	Hsp90ab1_1 705f	Unknown	0.0492	19.08
D12	Hsp90ab1_1 705f	Unknown	0.0492	19.18
G10	Hsp90ab1_1 677c	Unknown	0.0492	19.47	19.4533	0.0472582	0.00242931
G11	Hsp90ab1_1 677c	Unknown	0.0492	19.4
G12	Hsp90ab1_1 677c	Unknown	0.0492	19.49
H10	Hsp90ab1_1 688b	Unknown	0.0492	19.36	19.41	0.0953939	0.00491468
H11	Hsp90ab1_1 688b	Unknown	0.0492	19.52
H12	Hsp90ab1_1 688b	Unknown	0.0492	19.35
E1	Hsp90ab1_1 710a	Unknown	0.0483	20.06	19.9667	0.080829	0.0040482
E2	Hsp90ab1_1 710a	Unknown	0.0483	19.92
E3	Hsp90ab1_1 710a	Unknown	0.0483	19.92
F1	Hsp90ab1_1 714e	Unknown	0.0483	19.59	19.47	0.111355	0.00571933
F2	Hsp90ab1_1 714e	Unknown	0.0483	19.37
F3	Hsp90ab1_1 714e	Unknown	0.0483	19.45
Gja1_3	Well Name				Mean	SD	CV	∆Ct (RG)	∆∆Ct (WT)	NE
A1	Gja1_3 664k	Unknown	0.0831	19.78	19.5767	0.277909	0.0141959	-2.56583	-0.545625	1.45965	WT pGCCx43KO
A2	Gja1_3 664k	Unknown	0.0831	19.69
A3	Gja1_3 664k	Unknown	0.0831	19.26
B1	Gja1_3 672c	Unknown	0.0831	19.97	20.0933	0.15695	0.00781105	-2.24167	-0.221458	1.16591
B2	Gja1_3 672c	Unknown	0.0831	20.27
B3	Gja1_3 672c	Unknown	0.0831	20.04
C1	Gja1_3 687i	Unknown	0.0831	19.63	19.7167	0.090185	0.00457405	-2.06333	-0.043125	1.03034
C2	Gja1_3 687i	Unknown	0.0831	19.71
C3	Gja1_3 687i	Unknown	0.0831	19.81
D1	Gja1_3 705d	Unknown	0.0831	20.69	20.7067	0.115902	0.00559734	-1.21	0.810208	0.570299
D2	Gja1_3 705d	Unknown	0.0831	20.83
D3	Gja1_3 705d	Unknown	0.0831	20.6
E1	Gja1_3 677d	Unknown	0.0831	19.97	19.9167	0.0680686	0.00341767	-2.47	-0.0891667	1.06376	WT mGCCx43KO
E2	Gja1_3 677d	Unknown	0.0831	19.94
E3	Gja1_3 677d	Unknown	0.0831	19.84
F1	Gja1_3 688c	Unknown	0.0831	20.86	20.8667	0.0503322	0.00241209	-2.32833	0.0525	0.964264
F2	Gja1_3 688c	Unknown	0.0831	20.92
F3	Gja1_3 688c	Unknown	0.0831	20.82
G1	Gja1_3 710b	Unknown	0.0831	19.97	19.9933	0.0321455	0.00160781	-2.27333	0.1075	0.928195
G2	Gja1_3 710b	Unknown	0.0831	19.98
G3	Gja1_3 710b	Unknown	0.0831	20.03
H1	Gja1_3 714b	Unknown	0.0831	19.56	19.4967	0.085049	0.00436223	-2.45167	-0.0708333	1.05032
H2	Gja1_3 714b	Unknown	0.0831	19.4
H3	Gja1_3 714b	Unknown	0.0831	19.53
A4	Gja1_3 664c	Unknown	0.0831	22.72	22.8033	0.0971253	0.00425926	0.991667	3.01187	0.123975	KO pGCCx43KO
A5	Gja1_3 664c	Unknown	0.0831	22.91
A6	Gja1_3 664c	Unknown	0.0831	22.78
B4	Gja1_3 672h	Unknown	0.0831	23.79	23.4867	0.263881	0.0112354	1.02333	3.04354	0.121284
B5	Gja1_3 672h	Unknown	0.0831	23.31
B6	Gja1_3 672h	Unknown	0.0831	23.36
C4	Gja1_3 687a	Unknown	0.0831	23.73	23.6867	0.0450925	0.00190371	1.43667	3.45688	0.0910703
C5	Gja1_3 687a	Unknown	0.0831	23.64
C6	Gja1_3 687a	Unknown	0.0831	23.69
D4	Gja1_3 705f	Unknown	0.0831	23.68	23.6333	0.0450925	0.001908	1.75333	3.77354	0.0731225
D5	Gja1_3 705f	Unknown	0.0831	23.59
D6	Gja1_3 705f	Unknown	0.0831	23.63
E4	Gja1_3 677c	Unknown	0.0831	19.75	19.83	0.113578	0.00572759	-2.07167	0.309167	0.807108	KO mGCCx43KO
E5	Gja1_3 677c	Unknown	0.0831	19.78
E6	Gja1_3 677c	Unknown	0.0831	19.96
F4	Gja1_3 688b	Unknown	0.0831	19.98	19.8967	0.0763763	0.00383865	-2.01333	0.3675	0.775125
F5	Gja1_3 688b	Unknown	0.0831	19.88
F6	Gja1_3 688b	Unknown	0.0831	19.83
G4	Gja1_3 710a	Unknown	0.0831	20.04	19.9733	0.0763763	0.00382391	-2.40833	-0.0275	1.01924
G5	Gja1_3 710a	Unknown	0.0831	19.99
G6	Gja1_3 710a	Unknown	0.0831	19.89
H4	Gja1_3 714e	Unknown	0.0831	20.23	20.1133	0.115036	0.0057194	-2.09333	0.2875	0.819321
H5	Gja1_3 714e	Unknown	0.0831	20
H6	Gja1_3 714e	Unknown	0.0831	20.11
Gja6_1	Well Name				Mean	SD	CV	∆Ct (RG)	∆∆Ct (WT)	NE
A1	Gja6_1_1 664k	Unknown	0.0592	25.62	25.7567	0.119304	0.00463195	3.61417	-0.223958	1.16793	WT pGCCx43KO
A2	Gja6_1_1 664k	Unknown	0.0592	25.81
A3	Gja6_1_1 664k	Unknown	0.0592	25.84
B1	Gja6_1_1 672c	Unknown	0.0592	25.83	25.9733	0.126623	0.00487511	3.63833	-0.199792	1.14853
B2	Gja6_1_1 672c	Unknown	0.0592	26.07
B3	Gja6_1_1 672c	Unknown	0.0592	26.02
C1	Gja6_1_1 687i	Unknown	0.0592	26.01	25.8	0.193132	0.00748574	4.02	0.181875	0.881557
C2	Gja6_1_1 687i	Unknown	0.0592	25.63
C3	Gja6_1_1 687i	Unknown	0.0592	25.76
D1	Gja6_1_1 705d	Unknown	0.0592	26.16	25.9967	0.151767	0.00583795	4.08	0.241875	0.845646
D2	Gja6_1_1 705d	Unknown	0.0592	25.97
D3	Gja6_1_1 705d	Unknown	0.0592	25.86
E1	Gja6_1_1 677d	Unknown	0.0592	25.83	25.8767	0.0896289	0.00346369	3.49	-0.1675	1.12311	WT mGCCx43KO
E2	Gja6_1_1 677d	Unknown	0.0592	25.82
E3	Gja6_1_1 677d	Unknown	0.0592	25.98
F1	Gja6_1_1 688c	Unknown	0.0592	26.84	26.9133	0.118462	0.00440162	3.71833	0.0608333	0.95871
F2	Gja6_1_1 688c	Unknown	0.0592	27.05
F3	Gja6_1_1 688c	Unknown	0.0592	26.85
G1	Gja6_1_1 710b	Unknown	0.0592	26.11	26.2467	0.254231	0.00968622	3.98	0.3225	0.799683
G2	Gja6_1_1 710b	Unknown	0.0592	26.09
G3	Gja6_1_1 710b	Unknown	0.0592	26.54
H1	Gja6_1_1 714b	Unknown	0.0592	25.6	25.39	0.185203	0.00729431	3.44167	-0.215833	1.16137
H2	Gja6_1_1 714b	Unknown	0.0592	25.32
H3	Gja6_1_1 714b	Unknown	0.0592	25.25
A4	Gja6_1_1 664c	Unknown	0.0592	25.3	25.47	0.149332	0.00586305	3.65833	-0.179792	1.13272	KO pGCCx43KO
A5	Gja6_1_1 664c	Unknown	0.0592	25.53
A6	Gja6_1_1 664c	Unknown	0.0592	25.58
B4	Gja6_1_1 672h	Unknown	0.0592	26.21	26.0133	0.170978	0.00657269	3.55	-0.288125	1.22105
B5	Gja6_1_1 672h	Unknown	0.0592	25.93
B6	Gja6_1_1 672h	Unknown	0.0592	25.9
C4	Gja6_1_1 687a	Unknown	0.0592	26.26	26.1067	0.166233	0.00636745	3.85667	0.0185417	0.98723
C5	Gja6_1_1 687a	Unknown	0.0592	25.93
C6	Gja6_1_1 687a	Unknown	0.0592	26.13
D4	Gja6_1_1 705f	Unknown	0.0592	25.78	25.7067	0.0702377	0.00273228	3.82667	-0.0114583	1.00797
D5	Gja6_1_1 705f	Unknown	0.0592	25.7
D6	Gja6_1_1 705f	Unknown	0.0592	25.64
E4	Gja6_1_1 677c	Unknown	0.0592	25.89	25.78	0.199249	0.0077288	3.87833	0.220833	0.85807	KO mGCCx43KO
E5	Gja6_1_1 677c	Unknown	0.0592	25.9
E6	Gja6_1_1 677c	Unknown	0.0592	25.55
F4	Gja6_1_1 688b	Unknown	0.0592	25.68	25.8467	0.152753	0.00590995	3.93667	0.279167	0.824067
F5	Gja6_1_1 688b	Unknown	0.0592	25.98
F6	Gja6_1_1 688b	Unknown	0.0592	25.88
G4	Gja6_1_1 710a	Unknown	0.0592	26	25.8533	0.174738	0.00675882	3.47167	-0.185833	1.13747
G5	Gja6_1_1 710a	Unknown	0.0592	25.66
G6	Gja6_1_1 710a	Unknown	0.0592	25.9
H4	Gja6_1_1 714e	Unknown	0.0592	25.69	25.72	0.0793725	0.00308602	3.51333	-0.144167	1.10509
H5	Gja6_1_1 714e	Unknown	0.0592	25.81
H6	Gja6_1_1 714e	Unknown	0.0592	25.66
Gjc1_1	Well Name				Mean	SD	CV	∆Ct (RG)	∆∆Ct (WT)	NE
A7	Gjc1_1 664k	Unknown	0.0592	24.34	24.4433	0.153731	0.0062893	2.30083	-0.0614583	1.04352	WT pGCCx43KO
A8	Gjc1_1 664k	Unknown	0.0592	24.37
A9	Gjc1_1 664k	Unknown	0.0592	24.62
B7	Gjc1_1 672c	Unknown	0.0592	24.76	24.5333	0.259679	0.0105848	2.19833	-0.163958	1.12036
B8	Gjc1_1 672c	Unknown	0.0592	24.25
B9	Gjc1_1 672c	Unknown	0.0592	24.59
C7	Gjc1_1 687i	Unknown	0.0592	24.67	24.5067	0.160104	0.00653308	2.72667	0.364375	0.776805
C8	Gjc1_1 687i	Unknown	0.0592	24.35
C9	Gjc1_1 687i	Unknown	0.0592	24.5
D7	Gjc1_1 705d	Unknown	0.0592	23.93	24.14	0.185203	0.00767202	2.22333	-0.138958	1.10111
D8	Gjc1_1 705d	Unknown	0.0592	24.21
D9	Gjc1_1 705d	Unknown	0.0592	24.28
E7	Gjc1_1 677d	Unknown	0.0592	24.94	24.77	0.153948	0.0062151	2.38333	0.0516667	0.964821	WT mGCCx43KO
E8	Gjc1_1 677d	Unknown	0.0592	24.73
E9	Gjc1_1 677d	Unknown	0.0592	24.64
F7	Gjc1_1 688c	Unknown	0.0592	25.79	25.4667	0.359212	0.0141052	2.27167	-0.06	1.04247
F8	Gjc1_1 688c	Unknown	0.0592	25.53
F9	Gjc1_1 688c	Unknown	0.0592	25.08
G7	Gjc1_1 710b	Unknown	0.0592	24.96	24.8067	0.200333	0.00807577	2.54	0.208333	0.865537
G8	Gjc1_1 710b	Unknown	0.0592	24.88
G9	Gjc1_1 710b	Unknown	0.0592	24.58
H7	Gjc1_1 714b	Unknown	0.0592	24.08	24.08	0.01	0.000415282	2.13167	-0.2	1.1487
H8	Gjc1_1 714b	Unknown	0.0592	24.07
H9	Gjc1_1 714b	Unknown	0.0592	24.09
A10	Gjc1_1 664c	Unknown	0.0592	23.87	23.96	0.130767	0.00545772	2.14833	-0.213958	1.15987	KO pGCCx43KO
A11	Gjc1_1 664c	Unknown	0.0592	23.9
A12	Gjc1_1 664c	Unknown	0.0592	24.11
B10	Gjc1_1 672h	Unknown	0.0592	24.94	24.8267	0.120554	0.00485584	2.36333	0.00104167	0.999278
B11	Gjc1_1 672h	Unknown	0.0592	24.84
B12	Gjc1_1 672h	Unknown	0.0592	24.7
C10	Gjc1_1 687a	Unknown	0.0592	24.34	24.5033	0.1823	0.00743981	2.25333	-0.108958	1.07845
C11	Gjc1_1 687a	Unknown	0.0592	24.47
C12	Gjc1_1 687a	Unknown	0.0592	24.7
D10	Gjc1_1 705f	Unknown	0.0592	24.06	24.1167	0.051316	0.00212782	2.23667	-0.125625	1.09098
D11	Gjc1_1 705f	Unknown	0.0592	24.16
D12	Gjc1_1 705f	Unknown	0.0592	24.13
G10	Gjc1_1 677c	Unknown	0.0592	24.16	24.1767	0.0378594	0.00156595	2.275	-0.0566667	1.04006	KO mGCCx43KO
G11	Gjc1_1 677c	Unknown	0.0592	24.22
G12	Gjc1_1 677c	Unknown	0.0592	24.15
H10	Gjc1_1 688b	Unknown	0.0592	24.07	24.3033	0.210792	0.00867338	2.39333	0.0616667	0.958157
H11	Gjc1_1 688b	Unknown	0.0592	24.36
H12	Gjc1_1 688b	Unknown	0.0592	24.48
C1	Gjc1_1 710a	Unknown	0.0483	24.46	24.51	0.180278	0.00735527	2.12833	-0.203333	1.15136
C2	Gjc1_1 710a	Unknown	0.0483	24.36
C3	Gjc1_1 710a	Unknown	0.0483	24.71
D1	Gjc1_1 714e	Unknown	0.0483	24.8	24.6933	0.16773	0.00679252	2.48667	0.155	0.898132
D2	Gjc1_1 714e	Unknown	0.0483	24.78
D3	Gjc1_1 714e	Unknown	0.0483	24.5
